# Supplementary material
Source: Springer Nature journal article supplement (https://www.springermedizin.de/resource/supplementary/12876_2011_777_MOESM9_ESM.pdf/9437764)

5 days

8 days

A

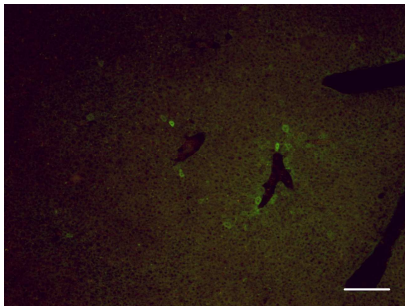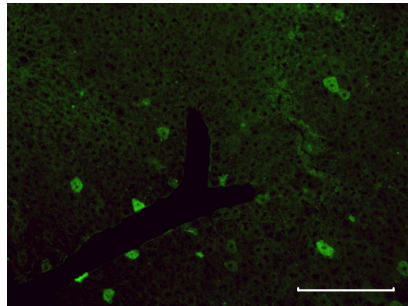

PBS

MSCs

B

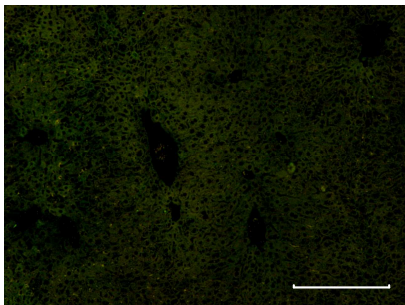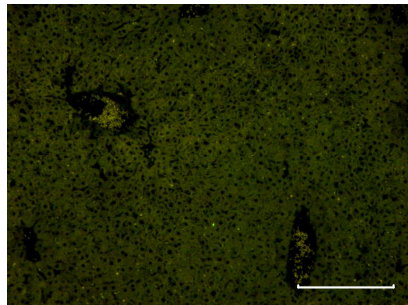

Supplement: MOESM9 [file 9437764]
